# Supplementary material
Source: ML conference proceedings conference paper supplement (https://openreview.net/forum?id=LZ5cx2yismf)
Supplement: supplementary_material [file attachment]

## Maintenance Plan

**Availability of data and platform** We have made FedScale open-source on the Github (<https://github.com/SymbioticLab/FedScale>). So the code and dataset can be downloaded from this repository. For each dataset, we provide detailed description (README.md) of the source, organization, format and use case under the repository. So far, these datasets are host on Dropbox, and we are migrating them to the stable storage of AWS. For the evaluation platform FAR, we provide the configuration and job submission guideline as well. We encourage the reviewer to refer to our repository for more details.

**Maintenance plan and responsibility.** We are actively updating our benchmark weekly, based on the feedback from the community. Currently, our dataset and platform are subject to the *Apache-2.0 License*. We respect the contributor of each dataset in following ways: (1) we provide the scripts for the developer to preprocess the downloaded raw data from its original source. This will absolutely obey the rule of each contributor; (2) for those publicly available and widely-used dataset, we temporally host the processed data on our repository. However, we are creating permissive license for each dataset and acknowledgement to respect their contributor, and highlight all assets in our repository are for research purpose only; (3) for all assets in our work, we have removed the sensitive information and use anonymous information to partition the data; (4) we are keeping in touch with all the contributors, and will fix any issues (e.g., by removing that dataset) once that happens.
