# Supplementary material
Source: ML conference proceedings conference paper supplement (https://openreview.net/forum?id=LZ5cx2yismf)
Supplement: supplementary_material [file attachment]

## A Introduction of FedScale Datasets

| Category | Name                 | Data Type | #Clients  | #Instances | Example Task                     |
|----------|----------------------|-----------|-----------|------------|----------------------------------|
| CV       | iNature [5]          | Image     | 2,295     | 193K       | Classification                   |
|          | FEMNIST [18]         | Image     | 3,400     | 640K       | Classification                   |
|          | OpenImage [4]        | Image     | 13,771    | 1.3M       | Classification, Object detection |
|          | Google Landmark [53] | Image     | 43,484    | 3.6M       | Classification                   |
|          | Charades [49]        | Video     | 266       | 10K        | Action recognition               |
|          | VLOG [23]            | Video     | 4,900     | 9.6K       | Classification, Object detection |
|          | Waymo Motion [21]    | Video     | 496,358   | 32.5M      | Motion prediction                |
| NLP      | Europarl [35]        | Text      | 27,835    | 1.2M       | Text translation                 |
|          | Blog Corpus [48]     | Text      | 19,320    | 137M       | Word prediction                  |
|          | Stackoverflow [10]   | Text      | 342,477   | 135M       | Word prediction, Classification  |
|          | Reddit [9]           | Text      | 1,660,820 | 351M       | Word prediction                  |
|          | Amazon Review [41]   | Text      | 1,822,925 | 166M       | Classification, Word prediction  |
|          | CoQA [45]            | Text      | 7,189     | 114K       | Question Answering               |
|          | LibriTTS [56]        | Text      | 2,456     | 37K        | Text to speech                   |
|          | Google Speech [52]   | Audio     | 2,618     | 105K       | Speech recognition               |
|          | Common Voice [2]     | Audio     | 12,976    | 1.1M       | Speech recognition               |
| Misc ML  | Taobao [11]          | Text      | 182,806   | 20.9M      | Recommendation                   |
|          | Fox Go [3]           | Text      | 150,333   | 4.9M       | Reinforcement learning           |

Table 4: Statistics of FedScale datasets. FedScale has 18 realistic client datasets, which are from the real-world collection, and we partitioned each dataset using its real client-data mapping.

FedScale currently has 18 realistic federated datasets across a wide range of scales and task categories (Table 4). Here, we provide the description of some representative datasets, and the reader can refer to FedScale repository (<https://github.com/SymbioticLab/FedScale>) for more datasets.

**Google Speech Commands.** A speech recognition dataset [52] with over ten thousand clips of one-second-long duration. Each clip contains one of the 35 common words (e.g., digits zero to nine, "Yes", "No", "Up", "Down") spoken by thousands of different people.

**OpenImage.** OpenImage [4] is a vision dataset collected from Flickr, an image and video hosting service. It contains a total of 16M bounding boxes for 600 object classes (e.g., Microwave oven). We clean up the dataset according to the provided indices of clients. In our evaluation, the size of each image is  $256 \times 256$ .

**Reddit and StackOverflow.** Reddit [9] (StackOverflow [10]) consists of comments from the Reddit (StackOverflow) website. It has been widely used for language modeling tasks, and we consider each user as a client. In this dataset, we restrict to the 30k most frequently used words, and represent each sentence as a sequence of indices corresponding to these 30k frequently used words.

**VLOG.** VLOG [23] is a video dataset collected from YouTube. It contains more than 10k Lifestyle Vlogs, videos that people purportedly record to show their lives, from more than 4k actors. This dataset aimed at understanding everyday human interaction and contains labels for scene classification, hand-state prediction task, and hand detection.

**LibriTTS.** LibriTTS [56] is a large-scale text-to-speech dataset. It is derived from audiobooks that are part of the LibriVox project [6]. There are 585 hours of read English speech from 2456 speakers at 24kHz sampling rate.

**Taobao.** Taobao Dataset [11] is a dataset of click rate prediction about display Ad, which is displayed on the website of Taobao. It is composed of 1,140,000 users ad display/click logs for

---

```

from fedscale.core.client_manager import ClientManager
import Oort

class Customized_ClientManager(ClientManager):
    def __init__(self, *args):
        super().__init__(*args)
        self.oort_selector = Oort.create_training_selector(*args)

    # Replace default client selection algorithm w/ Oort
    def resampleClients(self, numOfClients, cur_time, feedbacks):
        # Feed Oort w/ execution feedbacks from last training round
        oort_selector.update_client_info(feedbacks)
        selected_clients = oort_selector.select_participants(numOfClients, cur_time)

    return selected_clients

```

---

Figure 15: Evaluate new client selection algorithm [36].

|                                                                                                                                                                                                                                                                                                                                                                                                                                                                                                                |                                                                                                                                                                                                                                                                                                                                                                                                                                                                                                   |
|----------------------------------------------------------------------------------------------------------------------------------------------------------------------------------------------------------------------------------------------------------------------------------------------------------------------------------------------------------------------------------------------------------------------------------------------------------------------------------------------------------------|---------------------------------------------------------------------------------------------------------------------------------------------------------------------------------------------------------------------------------------------------------------------------------------------------------------------------------------------------------------------------------------------------------------------------------------------------------------------------------------------------|
| <hr/> <pre> from fedscale.core.client import Client  class Customized_Client(Client):     # Customize the training on each client     def train(self, client_data, model, conf):         # Get the training result from         # the default training component         training_result = super().train(             client_data, model, conf)          # Implementation of compression         compressed_result = compress_impl(             training_result)         return compressed_result </pre> <hr/> | <hr/> <pre> from fedscale.core.client import Client  class Customized_Client(Client):     # Customize the training on each client     def train(self, client_data, model, conf):         # Get the training result from         # the default training component         training_result = super().train(             client_data, model, conf)          # Clip updates and add noise         secure_result = secure_impl(             training_result)         return secure_result </pre> <hr/> |
|----------------------------------------------------------------------------------------------------------------------------------------------------------------------------------------------------------------------------------------------------------------------------------------------------------------------------------------------------------------------------------------------------------------------------------------------------------------------------------------------------------------|---------------------------------------------------------------------------------------------------------------------------------------------------------------------------------------------------------------------------------------------------------------------------------------------------------------------------------------------------------------------------------------------------------------------------------------------------------------------------------------------------|

Figure 16: Evaluate model compression [46].      Figure 17: Evaluate security enhancement [50].

529 8 days, which are randomly sampled from the website of Taobao. We partitioned it using its real  
530 client-data mapping.

531 **Waymo Motion.** Waymo Motion [21] is composed of 103,354 segments each containing 20  
532 seconds of object tracks at 10Hz and map data for the area covered by the segment. These segments  
533 are further broken into 9 second scenarios (8 seconds of future data and 1 second of history) with 5  
534 second overlap, and we consider each scenario as a client.

## 535 B Examples of New Plugins

536 In this section, we demonstrate several examples to show the ease of integrating today’s FL efforts  
537 for realistic evaluations in FedScale.

538 At its core, FAR provides flexible APIs on each module so that the developer can access and customize  
539 methods of the base class. Note that FAR will automatically integrate new plugins into evaluations,  
540 and then produces practical FL metrics. Figure 15 demonstrates that we can easily evaluate new client  
541 selection algorithms, Oort [36], by modifying a few lines of the `clientManager` module. Similarly,  
542 Figure 16 and Figure 17 show that we can extend the basic `Client` module to apply new gradient  
543 compression [46] and enhancement for malicious attack [50], respectively.
